# Supplementary material for: Celecoxib cocrystal polymorphs with cyclic amides: synthons of a sulfonamide drug with carboxamide coformers
Source: Royal Society of Chemistry journal article supplement (doi:10.1039/c3ce41885e), 2013-09-23
Supplement: c3ce41885e.pdf [file c3ce41885e.pdf]

## Celecoxib cocrystal polymorphs with cyclic amides: synthons of a sulfonamide drug with carboxamide cofomers†

Geetha Bolla, Sudhir Mittapalli, and Ashwini Nangia\*

### Electronic Supplementary Information†

**Table S1** Number of hits archived in the CSD on sulfonamides.

| CSD version 5.34<br>May 2013 update | Number of<br>primary and<br>secondary<br>sulfonamides | Number of<br>sulfonamides<br>cocrystals | Number of<br>sulfonamides<br>cocrystals with<br>carboxamide | Number of<br>sulfonamide-carboxylic<br>acid heterosynthon (in<br>single molecule) |
|-------------------------------------|-------------------------------------------------------|-----------------------------------------|-------------------------------------------------------------|-----------------------------------------------------------------------------------|
| Total No. hits in                   | 953                                                   | 27                                      | 3                                                           | 1                                                                                 |

**Table S2** Crystallographic parameters of the Celecoxib cocrystals.

|                                                    | CEL-PYR<br>(1:1)                                                                                                    | CEL-VLM-I<br>(1:1)                                                                                                 | CEL-VLM-II<br>(1:1)                                                                                                      | CEL-VLM-III<br>(1:1)                                                                                               | CEL-CPR<br>(1:1)                                                                                                    | CEL-AZL<br>(1:1)                                                                                                    |
|----------------------------------------------------|---------------------------------------------------------------------------------------------------------------------|--------------------------------------------------------------------------------------------------------------------|--------------------------------------------------------------------------------------------------------------------------|--------------------------------------------------------------------------------------------------------------------|---------------------------------------------------------------------------------------------------------------------|---------------------------------------------------------------------------------------------------------------------|
| Empirical<br>Formula                               | C <sub>17</sub> H <sub>14</sub> F <sub>3</sub> N <sub>3</sub> O <sub>2</sub> S.<br>C <sub>4</sub> H <sub>7</sub> NO | C <sub>17</sub> H <sub>14</sub> F <sub>3</sub> N <sub>3</sub> O <sub>2</sub><br>S.C <sub>5</sub> H <sub>9</sub> NO | 2(C <sub>17</sub> H <sub>14</sub> F <sub>3</sub> N <sub>3</sub> O<br><sub>2</sub> S).2(C <sub>5</sub> H <sub>9</sub> NO) | C <sub>17</sub> H <sub>14</sub> F <sub>3</sub> N <sub>3</sub> O <sub>2</sub><br>S.C <sub>5</sub> H <sub>9</sub> NO | C <sub>17</sub> H <sub>14</sub> F <sub>3</sub> N <sub>3</sub> O <sub>2</sub><br>S.C <sub>6</sub> H <sub>11</sub> NO | C <sub>17</sub> H <sub>14</sub> F <sub>3</sub> N <sub>3</sub> O <sub>2</sub><br>S.C <sub>7</sub> H <sub>13</sub> NO |
| Formula<br>weight                                  | 466.49                                                                                                              | 480.51                                                                                                             | 480.51                                                                                                                   | 480.51                                                                                                             | 494.54                                                                                                              | 508.57                                                                                                              |
| Crystal<br>system                                  | Monoclinic                                                                                                          | Triclinic                                                                                                          | Monoclinic                                                                                                               | Monoclinic                                                                                                         | Monoclinic                                                                                                          | Monoclinic                                                                                                          |
| Space<br>group                                     | <i>P</i> 2 <sub>1</sub>                                                                                             | <i>P</i> -1                                                                                                        | <i>P</i> 2 <sub>1</sub> / <i>c</i>                                                                                       | <i>P</i> 2 <sub>1</sub> / <i>n</i>                                                                                 | <i>P</i> 2 <sub>1</sub>                                                                                             | <i>P</i> 2 <sub>1</sub> / <i>c</i>                                                                                  |
| T (K)                                              | 298(2)                                                                                                              | 298(2)                                                                                                             | 298(2)                                                                                                                   | 298(2)                                                                                                             | 298(2)                                                                                                              | 298(2)                                                                                                              |
| <i>a</i> (Å)                                       | 11.0368(5)                                                                                                          | 8.7346(6)                                                                                                          | 22.591(2)                                                                                                                | 14.8501(18)                                                                                                        | 11.7189(11)                                                                                                         | 8.0409(5)                                                                                                           |
| <i>b</i> (Å)                                       | 8.6083(4)                                                                                                           | 11.2689(10)                                                                                                        | 8.6211(8)                                                                                                                | 8.4190(11)                                                                                                         | 8.7409(6)                                                                                                           | 27.2426(18)                                                                                                         |
| <i>c</i> (Å)                                       | 12.0762(6)                                                                                                          | 12.2391(9)                                                                                                         | 23.814(2)                                                                                                                | 17.761(2)                                                                                                          | 12.0503(10)                                                                                                         | 11.7927(8)                                                                                                          |
| <i>α</i> (°)                                       | 90.0                                                                                                                | 81.622(7)                                                                                                          | 90.0                                                                                                                     | 90.0                                                                                                               | 90.0                                                                                                                | 90.0                                                                                                                |
| <i>β</i> (°)                                       | 109.049(5)                                                                                                          | 87.560(6)                                                                                                          | 102.163(1)                                                                                                               | 93.901(2)                                                                                                          | 103.353(10)                                                                                                         | 105.806(7)                                                                                                          |
| <i>γ</i> (°)                                       | 90.0                                                                                                                | 73.363(7)                                                                                                          | 90.0                                                                                                                     | 90.0                                                                                                               | 90.0                                                                                                                | 90.0                                                                                                                |
| <i>V</i> (Å <sup>3</sup> )                         | 1084.51(9)                                                                                                          | 1141.94                                                                                                            | 4533.9(7)                                                                                                                | 2215.4(5)                                                                                                          | 1200.99                                                                                                             | 2485.6(3)                                                                                                           |
| <i>D</i> <sub>calcd</sub><br>(g cm <sup>-3</sup> ) | 1.429                                                                                                               | 1.384                                                                                                              | 1.408                                                                                                                    | 1.441                                                                                                              | 1.368                                                                                                               | 1.359                                                                                                               |
| <i>μ</i> (mm <sup>-1</sup> )                       | 0.206                                                                                                               | 0.198                                                                                                              | 0.199                                                                                                                    | 0.204                                                                                                              | 0.190                                                                                                               | 0.186                                                                                                               |
| <i>θ</i> range                                     | 2.9578 to<br>26.3148                                                                                                | 2.9516 to<br>28.8810                                                                                               | 2.36 to<br>273.8                                                                                                         | 2.30 to<br>23.04                                                                                                   | 2.76 to<br>26.30                                                                                                    | 2.85 to<br>26.31                                                                                                    |
| <i>Z</i> / <i>Z</i> <sup>1</sup>                   | 2/1                                                                                                                 | 2/1                                                                                                                | 8/2                                                                                                                      | 4/1                                                                                                                | 2/1                                                                                                                 | 4/1                                                                                                                 |
| Range <i>h</i>                                     | -13 to +13                                                                                                          | -10 to +10                                                                                                         | -26 to +26                                                                                                               | -18 to +18                                                                                                         | -8 to +13                                                                                                           | -10 to +5                                                                                                           |
| Range <i>k</i>                                     | -3 to 10                                                                                                            | -14 to +13                                                                                                         | -10 to +10                                                                                                               | -13 to +13                                                                                                         | -6 to +10                                                                                                           | -33 to +31                                                                                                          |
| Range <i>l</i>                                     | -15 to 12                                                                                                           | -12 to +15                                                                                                         | -28 to +28                                                                                                               | -10 to +10                                                                                                         | -14 to +12                                                                                                          | -14 to +14                                                                                                          |

|                         |            |            |              |              |            |            |
|-------------------------|------------|------------|--------------|--------------|------------|------------|
| Reflections collected   | 4337       | 8078       | 41174        | 23019        | 4400       | 4244       |
| Total reflections       | 2656       | 4662       | 7737         | 3832         | 2941       | 3115       |
| Observed reflections    | 2351       | 2382       | 6018         | 4532         | 2685       | 2455       |
| $R_1 [I > 2 \sigma(I)]$ | 0.0435     | 0.0577     | 0.0618       | 0.0545       | 0.0544     | 0.0759     |
| $wR_2$ (all)            | 0.1109     | 0.1374     | 0.1882       | 0.1881       | 0.1559     | 0.2280     |
| Goodness-of-fit         | 1.037      | 0.953      | 1.024        | 1.234        | 1.017      | 1.032      |
| Diffract meter          | Oxford CCD | Oxford CCD | Smart Bruker | Smart Bruker | Oxford CCD | Oxford CCD |

**Table S3** Hydrogen bonding distances/ angles.

| Crystal form      | Interaction   | H...A /Å | D...A /Å | $\angle D-H...A /^\circ$ | Symmetry code     |
|-------------------|---------------|----------|----------|--------------------------|-------------------|
| CEL-PYR           | N3-H3A...O3   | 2.05     | 2.908(1) | 158                      | - <sup>a</sup>    |
|                   | N3-H3B...O3   | 2.14     | 2.911(1) | 150                      | 1-x,1/2+y,-z      |
|                   | N4-H4A...O2   | 2.30     | 3.093(9) | 153                      | 1-x,-1/2+y,-z     |
|                   | C16-H16...O2  | 2.57     | 2.928(1) | 103                      | Intramolecular    |
|                   | C19-H19B...O1 | 2.29     | 3.160(1) | 158                      | 1-x,1/2+y,-z      |
| CEL-VLM-I (1:1)   | N3-H3A...O1   | 2.11     | 2.942(4) | 161                      | x,y,-1+z          |
|                   | C12-H12...O5  | 2.68     | 3.483(4) | 145                      | 1-x,2-y,-z        |
|                   | N4-H4A...O5   | 2.23     | 3.037(4) | 131                      | x,y,1+z           |
|                   | N4-H4A...O1   | 1.87     | 2.813(4) | 160                      | 1-x,2-y,-z        |
|                   | C12-H12...N1  | 2.66     | 3.579(6) | 169                      | X,y,-2+z          |
| CEL-VLM-II (1:1)  | N3-H3A...O5   | 1.95     | 2.803(4) | 164                      | x,1/2-y,1/2+z     |
|                   | N3H3B...O1    | 2.11     | 2.934(4) | 169                      | x,1/2-y,1/2+z     |
|                   | N6-H6A...O6   | 1.90     | 2.763(4) | 175                      | x,3/2-y,-1/2+z    |
|                   | N6-H6B...O4   | 2.17     | 2.913(4) | 148                      | x,3/2-y,-1/2+z    |
|                   | N7-H7A...O5   | 2.05     | 2.889(4) | 163                      | 1-x,1-y,-z        |
|                   | N8-H8A...O6   | 2.12     | 2.937(4) | 172                      | -x,1-y,1-z        |
|                   | C14-H14...O1  | 2.48     | 2.864(4) | 105                      | - <sup>a</sup>    |
|                   | C19-H19...O4  | 2.56     | 3.453(3) | 162                      | x,1/2-y,-1/2+z    |
|                   | C33-H33...O3  | 2.49     | 2.878(4) | 105                      | - <sup>a</sup>    |
| CEL-VLM-III (1:1) | N3-H3A...O3   | 2.10     | 2.905(5) | 170                      | - <sup>a</sup>    |
|                   | N3-H3B...O2   | 2.31     | 3.145(5) | 162                      | 1/2-x,1/2+y,5/2-z |
|                   | N4-H4A...O3   | 2.07     | 2.954(5) | 177                      | -x,1-y,2-z        |
|                   | C16-H16...O1  | 2.50     | 2.887(4) | 105                      | Intramolecular    |
| CEL-CPR (1:1)     | N3-H3A...O2   | 2.56     | 2.918(8) | 101                      | 1-x,1/2+y,-z      |
|                   | N3-H3A...O3   | 1.97     | 2.873(1) | 151                      | 1-x,1/2+y,1-z     |
|                   | N3-H3B...O3   | 2.26     | 3.022(5) | 165                      | x,1+y,-1+z        |
|                   | N3-H3B...O2   | 2.57     | 2.918(8) | 109                      | 1-x,1/2+y,-z      |
|                   | N4-H4A...O1   | 2.12     | 2.942(5) | 160                      | x,y,1+z           |

|               |               |      |          |     |                |
|---------------|---------------|------|----------|-----|----------------|
|               | C16–H16···O1  | 2.58 | 2.935(1) | 103 | Intramolecular |
|               | C19–H19B···O2 | 2.60 | 3.354(2) | 135 | x,y,1+z        |
| CEL–AZL (1:1) | N3–H3A···O2   | 2.13 | 2.979(5) | 147 | 2-x,-y,-z      |
|               | N3–H3B···O3   | 2.07 | 2.826(5) | 158 | 1+x,y,z        |
|               | N4–H4A···O3   | 2.16 | 2.998(6) | 164 | 1-x,-y,1-z     |
|               | C14–H14···O1  | 2.59 | 2.945(5) | 103 | Intramolecular |

**Table S4** IR stretching frequency of the CEL cocrystals.

| API/cocrystal | –C=O<br>(Carboxamide/cocrystal),<br>(cm <sup>-1</sup> ) | –S=O (Sulfonamide<br>symmetric, asymmetric)<br>(cm <sup>-1</sup> ) | –NH <sub>2</sub> sulfonamide<br>(cm <sup>-1</sup> ) |
|---------------|---------------------------------------------------------|--------------------------------------------------------------------|-----------------------------------------------------|
| CEL           | ---                                                     | 1164.7, 1347.7                                                     | 3339.5, 3233.0                                      |
| CEL–VLM-I     | 1632.4/1662.2                                           | 1162.8, 1344.9                                                     | 3323.6, 3226.4                                      |
| CEL–VLM-II    | 1632.4/1652.4                                           | 1162.3, 1340.4                                                     | 3428.0                                              |
| CEL–VLM-III   | 1632.4/1642.8                                           | 1340.0                                                             | 3450.7                                              |
| CEL–CPR       | 1636.0/1643.2                                           | 1169.7, 1340.3                                                     | 3328.0                                              |

**Table S5** Melting point of CEL cocrystals.

| S.NO | API/ cocrystal | M.P of coformer/API °C | M.P of cocrystal °C |
|------|----------------|------------------------|---------------------|
| 1    | CEL            | 163                    | ---                 |
| 3    | CEL–VLM-I      | 38-40                  | 106-108             |
| 4    | CEL–VLM-II     | 38-40                  | 108-111             |
| 5    | CEL–VLM-III    | 38-40                  | 71-74               |
| 6    | CEL–CPR        | 69                     | 110-111             |

**Table S6** ss-NMR chemical shift (ppm) of CEL cocrystals.

|                                      | CEL    | CEL–VLM-I                      | CEL–VLM-II                              | CEL–VLM- III                          | CEL–CPR                 |
|--------------------------------------|--------|--------------------------------|-----------------------------------------|---------------------------------------|-------------------------|
| CH <sub>3</sub> ,<br>CH <sub>2</sub> | 19.12  | 19.14, 22.16,<br>28.42, 30.93. | 20.5, 22.18,<br>28.52, 31.22,<br>41.92. | 20.33, 21.35, 28.30,<br>31.94, 41.25. | 20.58, 30.98,<br>43.95. |
| CF <sub>3</sub>                      | 102.40 | 106.88                         | 102.45,<br>107.644, 110.9               | 107.52, 110.95                        | 106.35,                 |
| Aromatic<br>region                   | 123.09 | 119.62                         | 120.43                                  | 122.74                                | 120.58                  |
|                                      | 124.17 | 124.86                         | 123.38                                  | 126.14                                | 123.05                  |
|                                      | 126.25 | 126.81                         | 126.35                                  | 127.27                                | 125.84                  |
|                                      | 129.25 | 129.35                         | 128.08, 129.2                           | 130.15                                | 128.39                  |
|                                      | 131.17 | 131.65                         | 131.62                                  | 139.98                                | 129.27                  |
|                                      | 141.29 | 139.34                         | 139.45                                  | 142.65                                | 138.73                  |
|                                      | 142.35 | 141.77                         | 141.76                                  | 143.85                                | 141.64                  |
|                                      | 144.85 | 144.59                         | 143.78                                  |                                       | 143.45, 145.43          |
| –C=O                                 |        | 175.43                         | 173.16, 175.51                          | 174.10                                | 180.87                  |

**Table S7** Cocrystal polymorph sets retrieved from the CSD and updated to May 2013, ver. 5.34, as well as recent publications checked manually. For a recently published survey statistics, see *Cryst. Growth Des.*, 2010, **10** 2229–2238 by R. B. H. Tan et al.

| TETRAMORPHIC COCRYSTAL SYSTEMS (3)                               |                        |                                                                     |                                                         |                                                                                                                                  |                                |                                |
|------------------------------------------------------------------|------------------------|---------------------------------------------------------------------|---------------------------------------------------------|----------------------------------------------------------------------------------------------------------------------------------|--------------------------------|--------------------------------|
| LASIX:NICOTINAMIDE<br>YASGOQ<br>YASGOQ01<br>YASGOQ02<br>YASGOQ03 |                        | GALLIC ACID:ACETAMIDE<br>PEFGEO<br>PEFGEO01<br>PEFGEO02<br>PEFGEO03 |                                                         | P-TETRA CHLORO DICYANO<br>BENZENE<br>:HEXA METHYL BENZENE<br>(TBD:HMB)<br>ADULEQ<br>ADULEQ01<br>ADULEQ02<br>ADULEQ03<br>ADULEQ04 |                                |                                |
| TRIMORPHIC COCRYSTAL SYSTEMS (3)                                 |                        |                                                                     |                                                         |                                                                                                                                  |                                |                                |
| 4,4'-BIPYRIDINE:PIMELIC ACID<br>XOLHUC<br>XOLHUC01<br>XOLHUC02   |                        | ETHENZAMIDE:GENTISIC ACID<br>QULLUF<br>QULLUF01<br>QULLUF02         |                                                         | BARBITURIC ACID:UREA<br>EFOZAB<br>EFOZAB01<br>EFOZAB02<br>EFOZAB03<br>EFOZAB04                                                   |                                |                                |
| DIMORPHIC COCRYSTAL SYSTEMS (95)                                 |                        |                                                                     |                                                         |                                                                                                                                  |                                |                                |
| ABEKUN<br>ABEKUN01<br>ABEKUN02                                   | ABUNIU<br>ABUNIU01     | ACYOYOG<br>ACYOYOG01                                                | AJAJEA<br>AJAJEA01                                      | ANTCYB,<br>ANTCYB12<br>ANTCYB11<br>ANTCYB13<br>ANTCYB14<br>ANTCYB15<br>ANTCYB16                                                  | ANUMEC<br>ANUMEC01             | BIVSIJ01<br>BIVSIJ02           |
| COHWIF,<br>COHWIF02,<br>COHWIF03<br>COHWIF01                     | DOKGUG<br>DOKGUG01     | DURZAR<br>DURZAR01                                                  | EFOZAB,<br>EFOZAB03<br>EFOZAB01<br>EFOZAB04<br>EFOZAB02 | ELEGUY<br>ELEGUY01                                                                                                               | ENAZOI<br>ENAZOI01             | EPUPUB<br>EPUPUB01             |
| FAHLEF01<br>FAHLEF02                                             | FIHYEA<br>FIHYEA02     | HADKUT<br>HADKUT01                                                  | IJETOG<br>IJETOG02                                      | IJIBEJ<br>IJIBEJ01                                                                                                               | KIBQOC<br>KIBQOC01             | KIHYOQ<br>KIHYOQ01             |
| LOFKIB<br>LOFKIB01                                               | MIYKOU<br>MIYKOU01     | MOXVIF<br>MOXVIF01                                                  | MUROXA<br>MUROXA01                                      | NAPYMA<br>NAPYMA01                                                                                                               | NARSOP<br>NARSOP01<br>NARSOP02 | NITRIR<br>NITRIR01             |
| NUGZEV<br>NUGZEV01                                               | NUKWEW<br>NUKWEW0<br>1 | NUKXEX<br>NUKXEX01                                                  | ODOBIT<br>ODOBIT01                                      | PTZTCQ<br>PTZTCQ01                                                                                                               | QUIDON<br>QUIDON01<br>QUIDON02 | QULLUF<br>QULLUF01<br>QULLUF02 |
| RIWWEA<br>RIWWEA01                                               | RURROM<br>RURROM01     | SAYMUB<br>SAYMUB01                                                  | TAMBUE<br>TAMBUE01                                      | TECCAF01<br>TECCAF02                                                                                                             | TEHNAW<br>TEHNAW01             | TIPWIY<br>TIPWIY01             |

|                                                                    |                                                  |                                                  |                                                            |                                            |                                                                                                                                  |                                                |
|--------------------------------------------------------------------|--------------------------------------------------|--------------------------------------------------|------------------------------------------------------------|--------------------------------------------|----------------------------------------------------------------------------------------------------------------------------------|------------------------------------------------|
| TUPRBN01<br>TUPRBN10                                               | ULAWAF<br>ULAWAF01<br>ULAWAF02                   | UNEZAO<br>UNEZAO01                               | VAKTOS<br>VAKTOS01                                         | VEJXAJ<br>VEJXAJ01                         | VUHFIO<br>VUHFIO01                                                                                                               | VUJSOJ<br>VUJSOJ01                             |
| WATREP,<br>WATREP01<br>WATREP04<br>WATREP02<br>WATREP03            | WOBQEK<br>WOBQEK01                               | WOTZAG<br>WOTZAG01                               | WUZHOP<br>WUZHOP01                                         | XETZIG<br>XETZIG01                         | XOLHUC<br>XOLHUC01<br>XOLHUC02                                                                                                   | YABHAM<br>YABHAM01                             |
| ZZZGMW01<br>ZZZGMW02                                               | EWAPAU<br>EWAPAU01                               | EXAPID<br>EXAPID01                               | UBUJIM<br>UBUJIM01                                         | PANQUS<br>PANQUS01                         | AWIH0E02<br>AWIH0E03<br>AWIH0E04<br>AWIH0E05<br>AWIH0E06<br>AWIH0E07<br>AWIH0E08<br>AWIH0E09<br>AWIH0E10<br>AWIH0E11<br>AWIH0E12 | YASGOQ<br>YASGOQ01<br>YASGOQ02<br>YASGOQ03     |
| CAZLAR,<br>CAZLAR01<br>CAZLAR02                                    | EXUQUJ<br>EXUQUJ01                               | LOCVOO<br>LOCVOO01                               | NOVSIA<br>NOVSIA01                                         | RIFQAY<br>RIFQAY01<br>RIFQAY02<br>RIFQAY03 | WOQBAF<br>WOQBAF01                                                                                                               | ZODWIY<br>ZODWIY01                             |
| TONDUV<br>TONDUV02                                                 | WANNUV<br>WANNUV01                               | WUVKEE<br>WUVKEE01<br>WUVKEE02                   | ISIJE<br>NUKYUO<br>NUKYUO01<br>NUKYUO02                    |                                            | HOLJAU<br>HOLJAU01<br>HOLJAU02<br>HOLJAU03<br>HOLJAU04<br>HOLJAU05<br>HOLJAU06<br>HOLJAU07                                       | IJETEW<br>IJETEW01                             |
| JICTUK<br>IJETEW10                                                 | MOCCOW<br>MOCCOW0<br>1                           | PIYQEU<br>PIYQEU02                               | UKOSAP<br>UKOSAP01                                         | WATREP<br>WATREP01<br>WATREP02             | ACOMUC<br>ACOMUC01                                                                                                               | ACONIR<br>ACONIR02                             |
| CEKKOU<br>CEKKOU01                                                 | Temozolomi<br>de:4-OH-<br>Benzamide <sup>1</sup> | Isoniazid: 4-<br>OH Benzoic<br>acid <sup>2</sup> | Isoniazid:<br>Fumaric acid <sup>2</sup>                    | Caffeine:Theop<br>hylline <sup>3</sup>     | Sulfacetamide:<br>Acetamide <sup>4</sup>                                                                                         | 3-OH<br>Benzoic acid:<br>Acridine <sup>5</sup> |
| 2,4-<br>Dihydroxybe<br>nzoic acid:<br>Nicotinamide<br><sup>5</sup> | Malonic acid:<br>Nicotinamide<br><sup>5</sup>    | Pimelic acid:<br>Nicotinamide <sup>5</sup>       | Caffeine:4-<br>Chloro-3-nitro<br>benzoic acid <sup>6</sup> |                                            |                                                                                                                                  |                                                |

Recent publications of polymorphic cocrystals not yet assigned REFCOD in CSD

1 P. Sanphui, N. J. Babu and Ashwini Nangia, *Cryst. Growth Des.*, 2013, **13**, 2208.

- 2 S. Aitipamula, A. B. H. Wong, P. S. Chow and R. B.H. Tan, *CrystEngComm*, 2013, **15**, 5877.  
3 M. D. Eddleston, B. Patel, G. M. Day and W. Jones, *Cryst. Growth Des.*, DOI:  
10.1021/cg401179s.  
4 N. R. Goud and A. Nangia, *CrystEngComm*, 2013, **15**, 7456.  
5 A. Lemmerer, D. A. Adsmond, C. Esterhuysen and J. Bernstein, *Cryst. Growth Des.*, 2013,  
**13**, 3935.  
6 S. Ghosh, A. Mondal, M. S. R. N. Kiran, U. Ramamurty and C. M. Reddy, *Cryst. Growth  
Des.*, DOI: 10.1021/cg400928v.

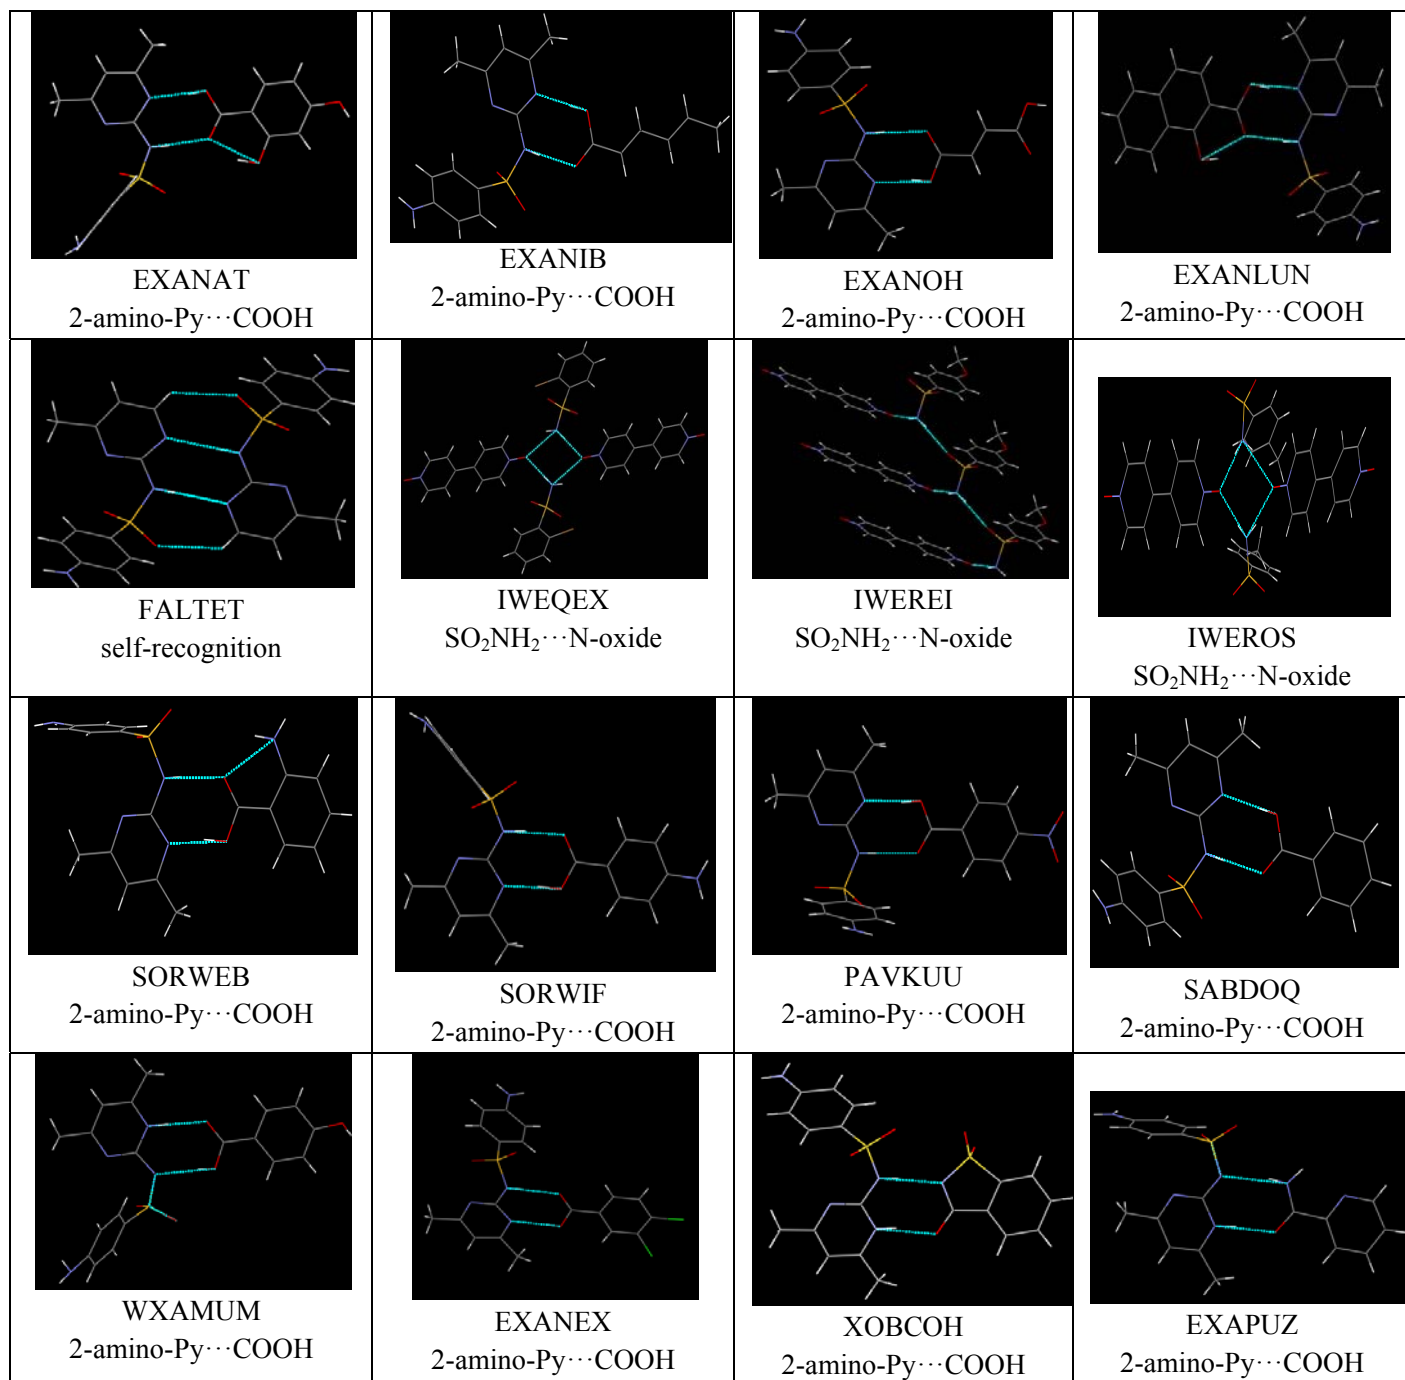

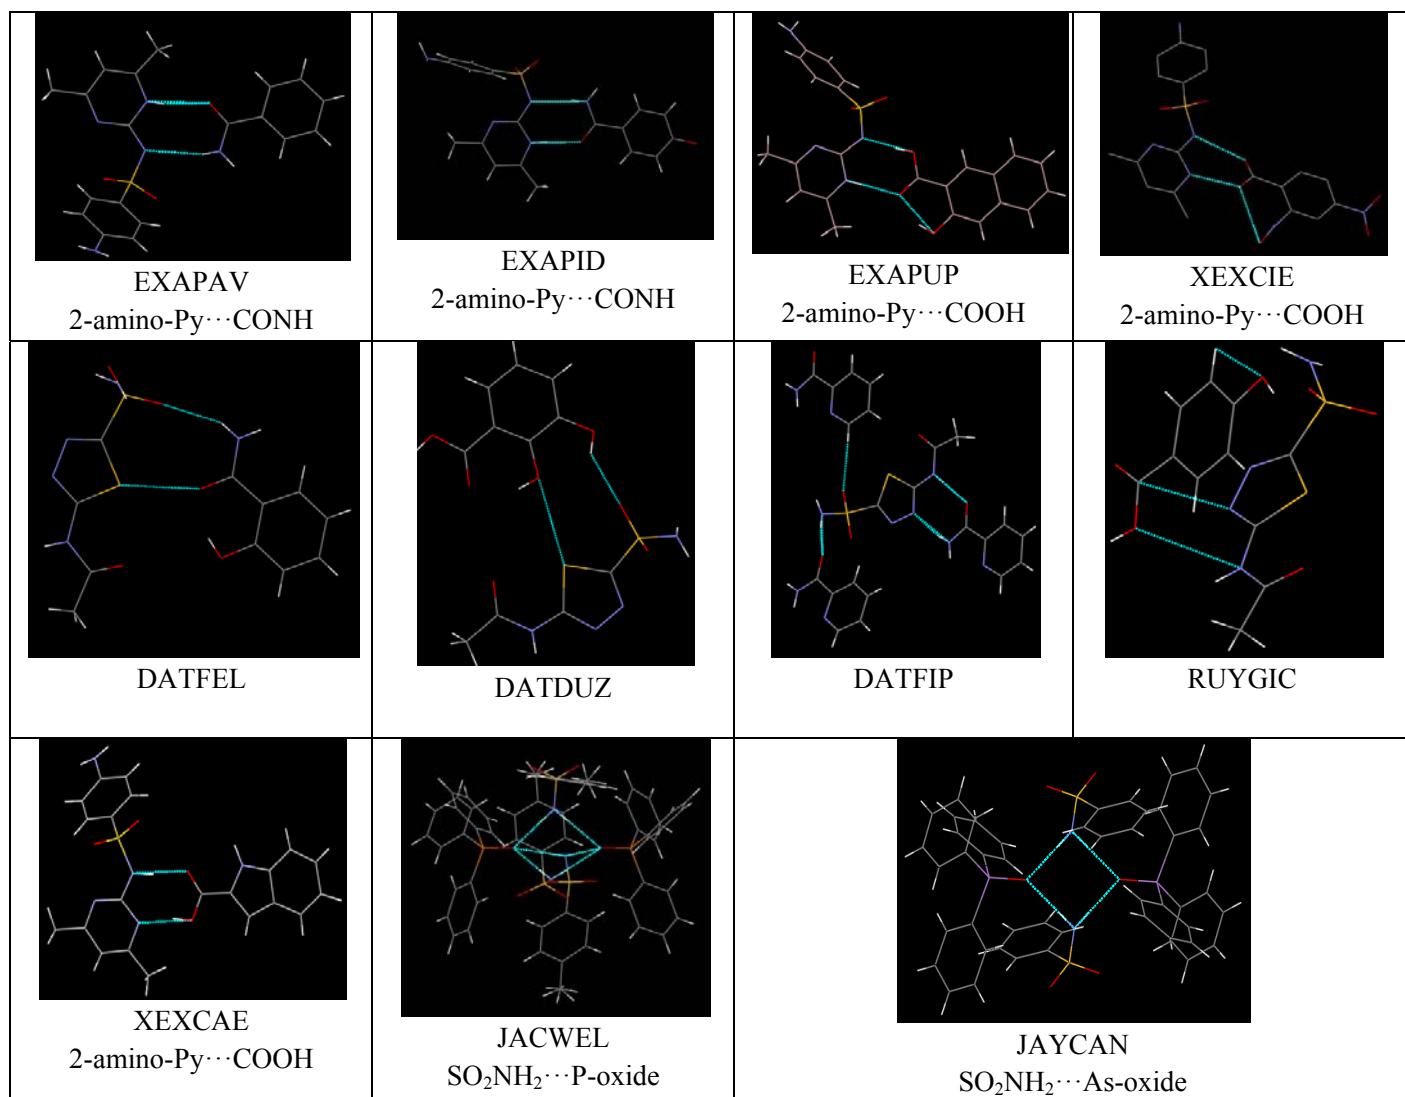

**Fig. S1** CSD Refcodes search of sulfonamides cocrystals. Several molecules contain the SO<sub>2</sub>-NH-2-NH-Py moiety and the cocrystals with carboxylic acids/ carboxamides contain the heterosynthon with the basic moiety but not the SO<sub>2</sub>NH group.<sup>1</sup> Sulfonamide-N-oxide cocrystals were reported recently.<sup>2</sup> The common synthons are named.

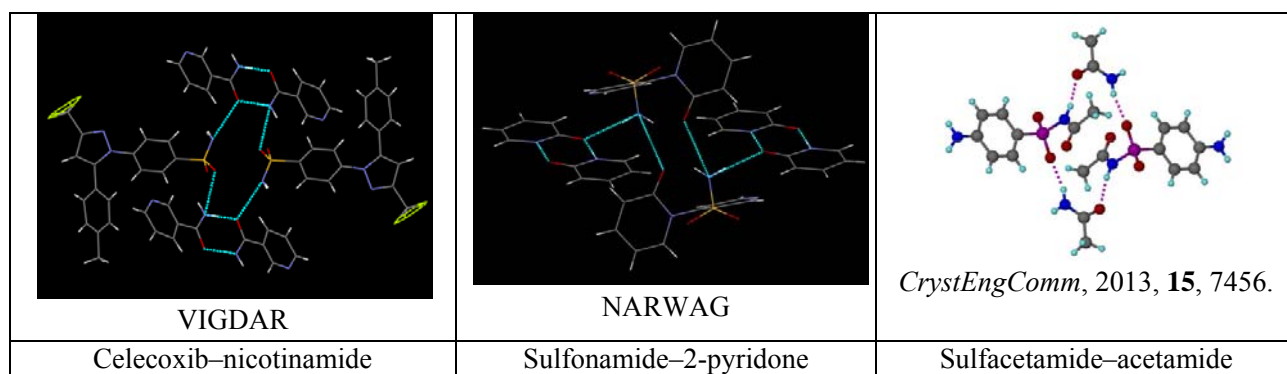

**Fig. S2** Sulfonamides cocrystals with pyridine and primary carboxamides, but there is no predictable motif.

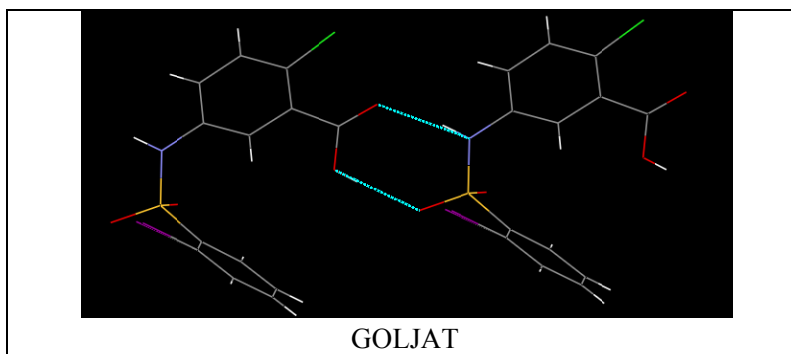

**Fig. S3** Sulfonamide–carboxylic acid synthon in a single molecule structure.

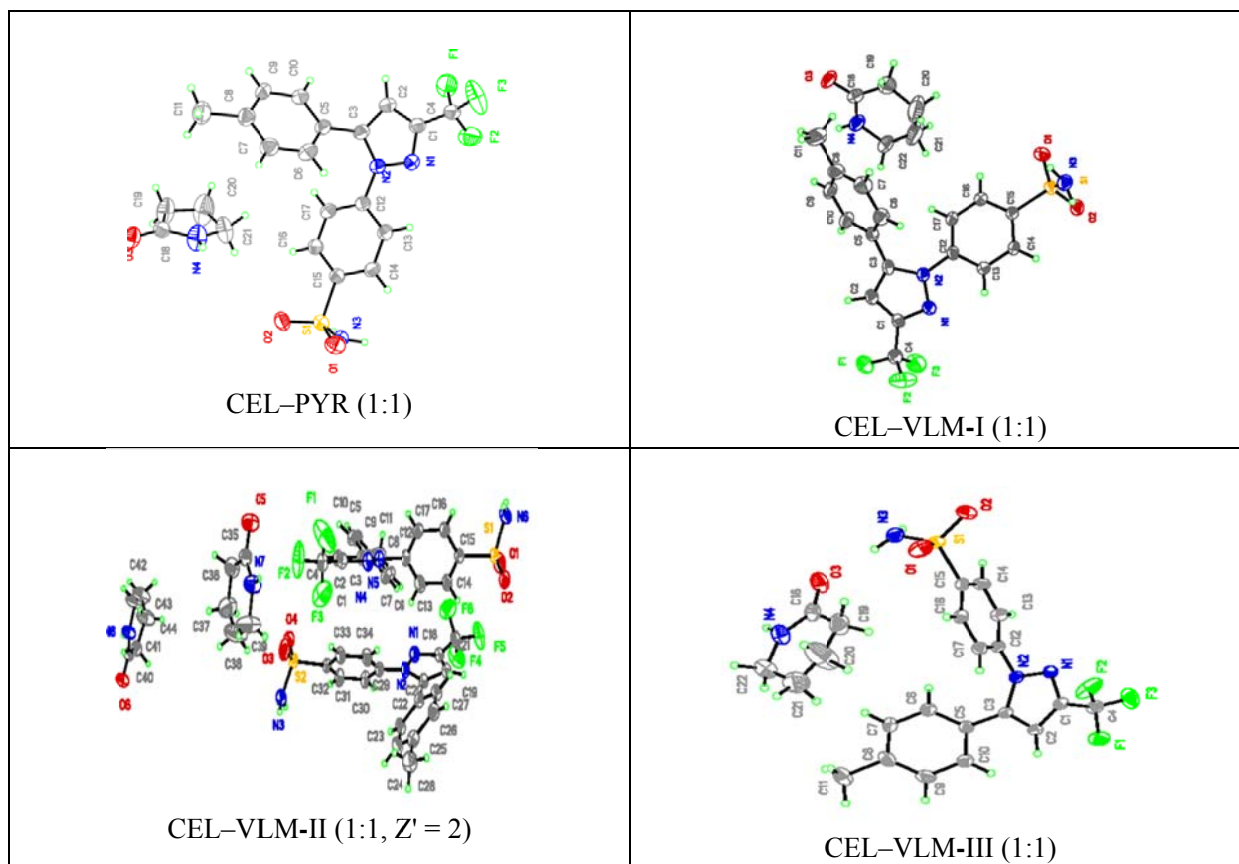



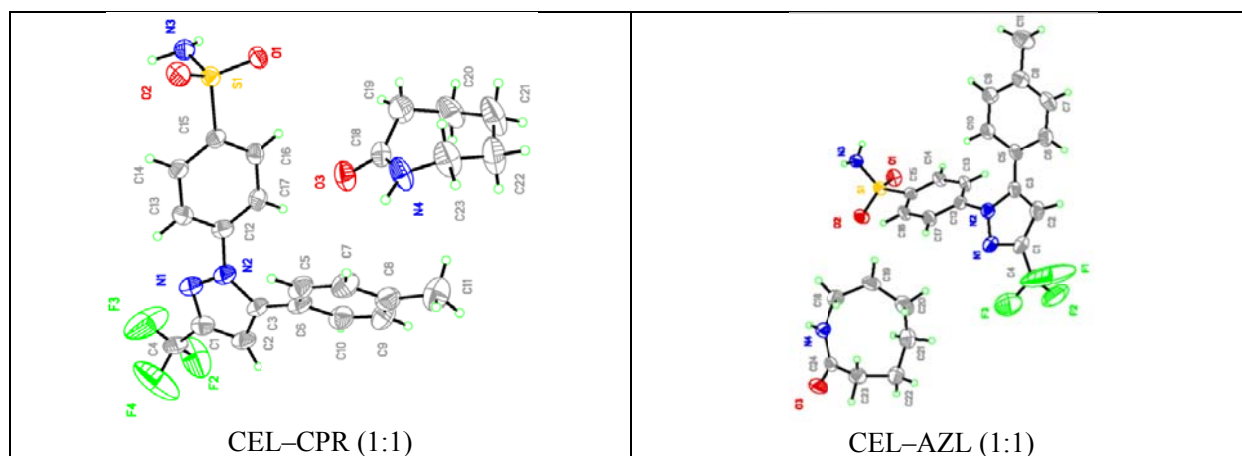

**Fig. S4** ORTEP diagrams (heavy atoms at 35% probability) of CEL cocrystals confirm the molecular composition and stoichiometry.

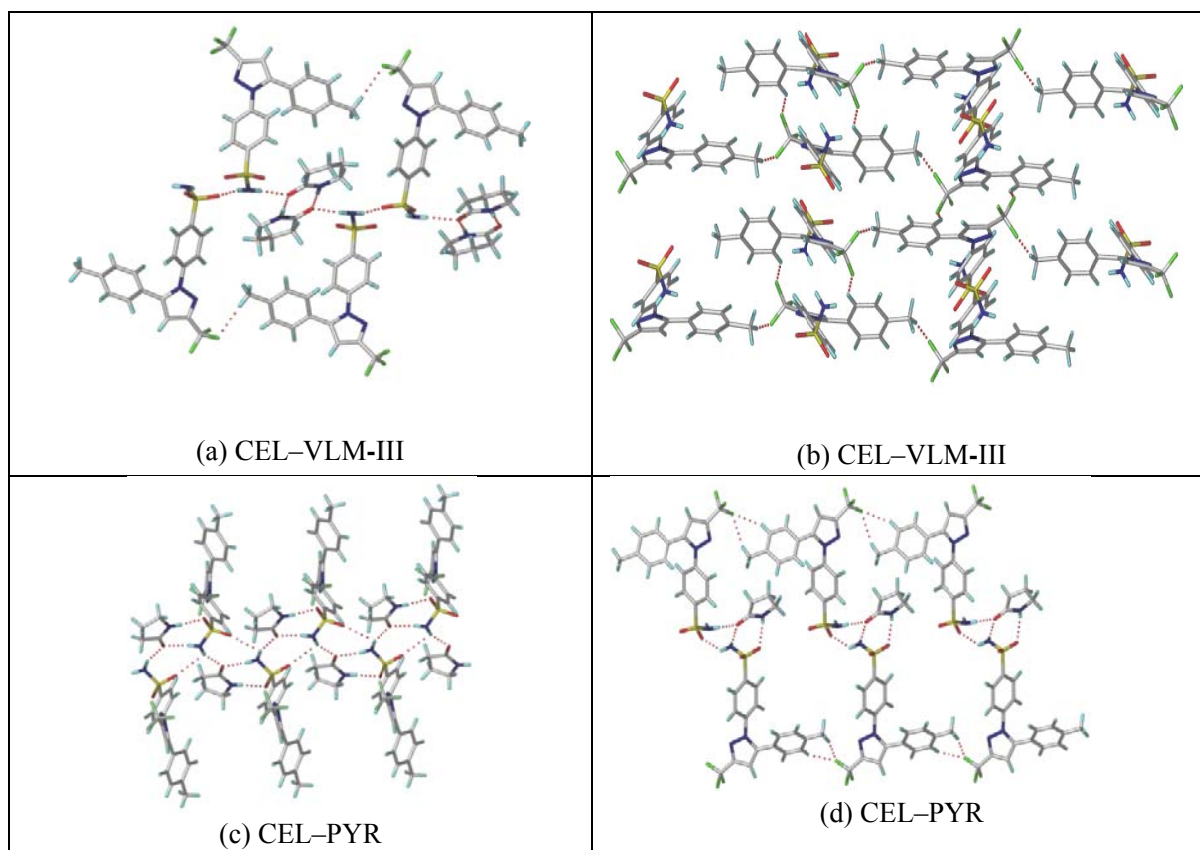

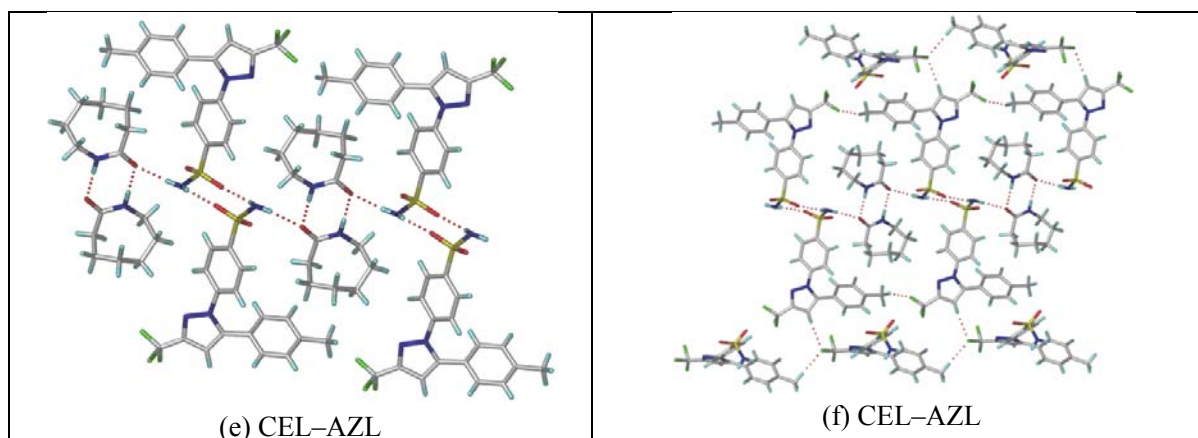

**Fig. S5** (a) Crystal structure of CEL-VLM-III (1:1) is sustained by amide dimer and sulfonamide catemer synthons, along with (b) auxiliary C-H...F interactions. (c) Sulfonamide-carboxamide heterosynthon of N-H...O H-bonds in CEL-2-PYR. (d) A view of the trimer synthon of two CEL and one PYR molecules. (e) CEL and AZL dimer  $R_2^2(8)$  motifs are connected by N-H...O hydrogen bonds, which extend through C-H...F interactions.

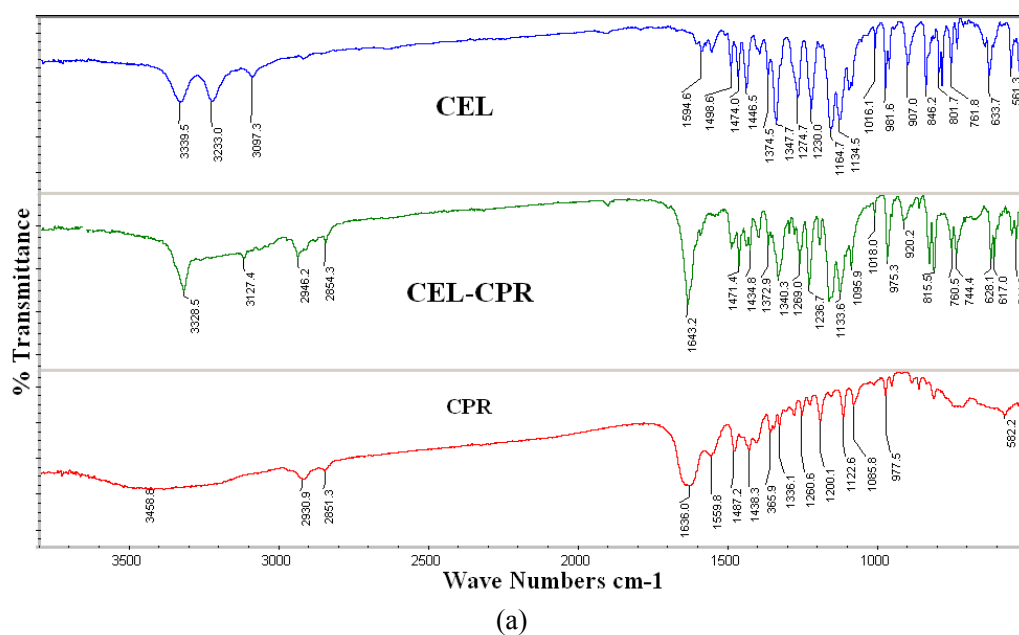

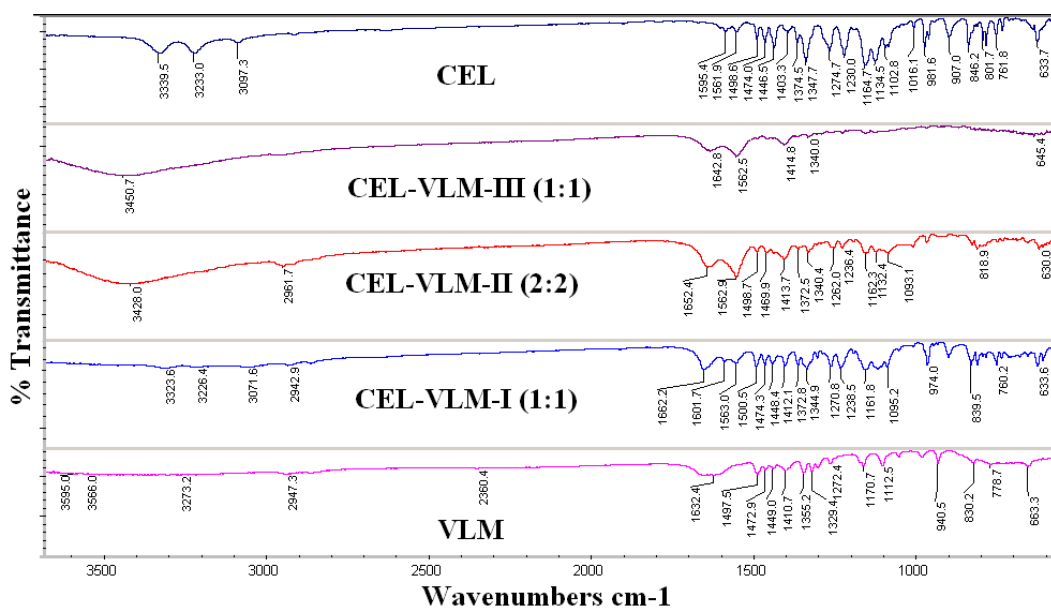

(b)

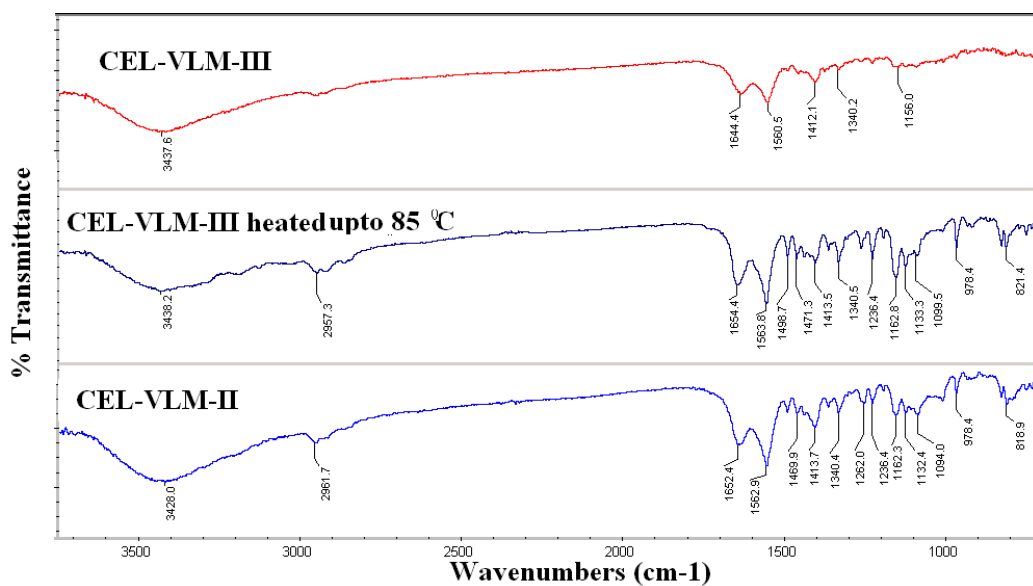

(c)

**Fig. S6** FT-IR spectra. (a) CEL, CPR and grinded material in (1:1) ratio CEL–CPR; (b) CEL, VLM and trimorphic forms CEL–VLM-I, CEL–VLM-II and CEL–VLM-III; (c) Heating form III CEL–VLM up to 85 °C shows peak at 1654.4 cm<sup>-1</sup> that is characteristic of CEL–VLM-II, to show phase transformation of form III to form II upon heating.

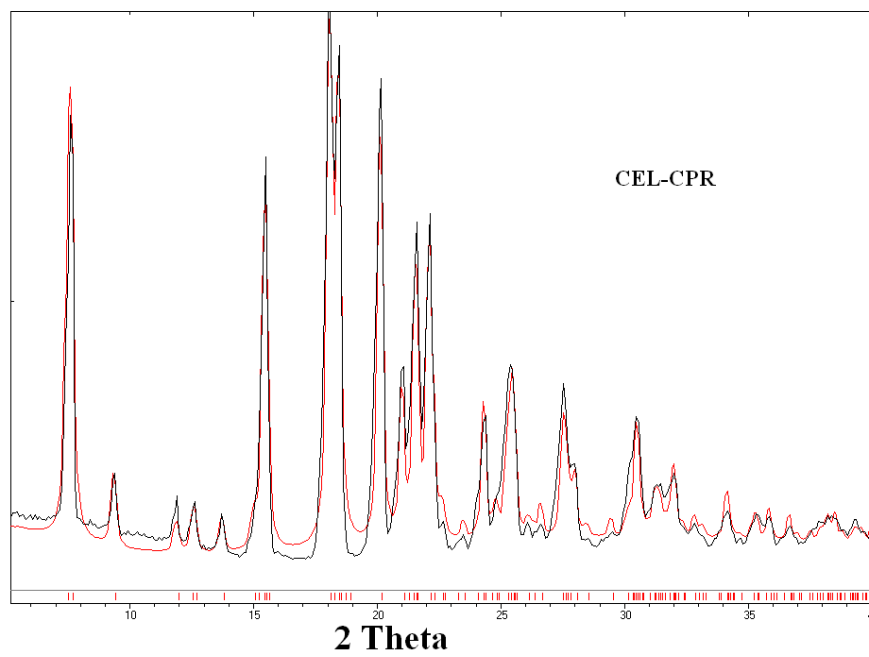

(a)

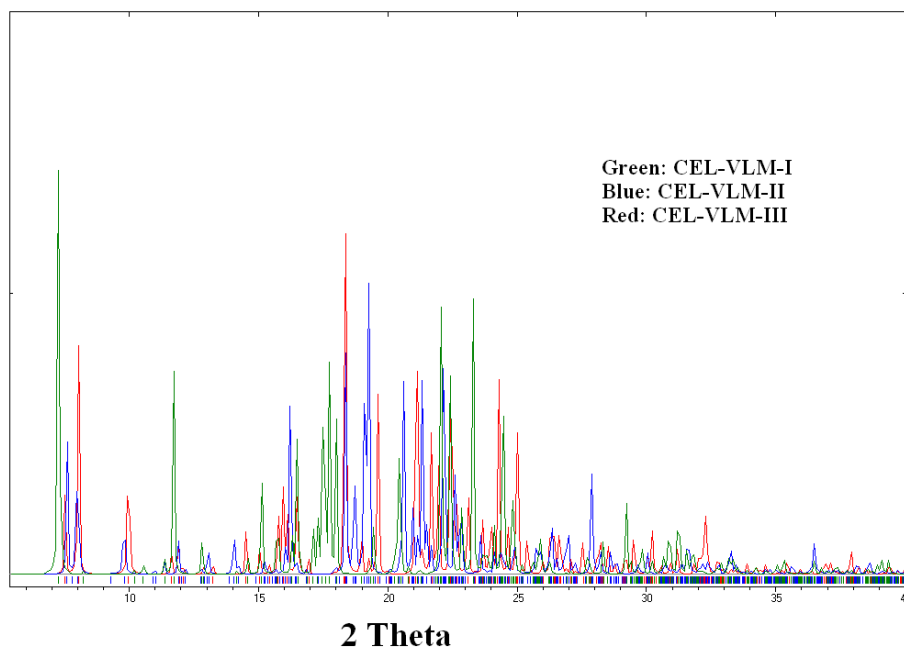

(b)

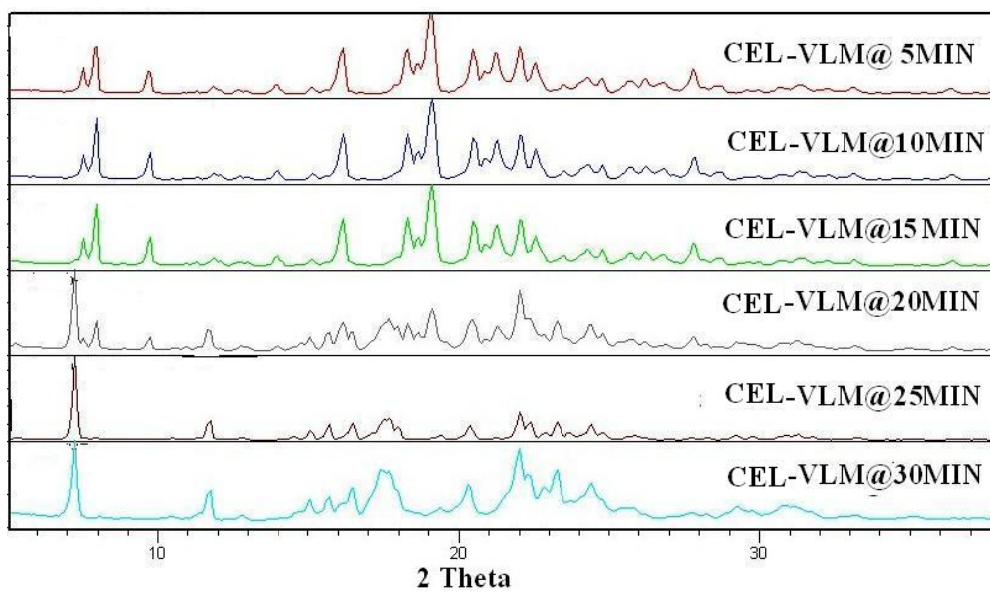

(c)

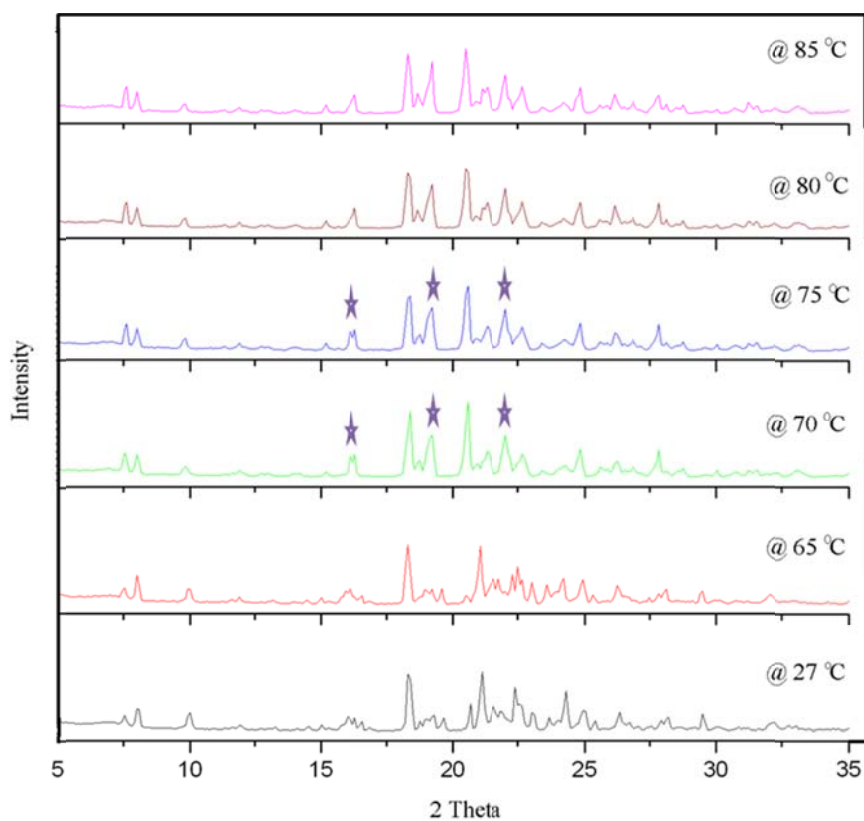

(d)

**Fig. S7** (a) PXRD comparison of CEL-CPR (1:1) grinded material (black) with the calculated lines from the X-ray crystal structure (red) indicate purity of the bulk phase. (b) Calculated X-ray diffraction lines of CEL-VLM polymorphs I-III. (c) PXRD comparison of an equimolar ratio of CEL and VLM grinding experiment for different times of 5-30 min shows gradual transformation from polymorph II to I (CEL-

VLM-I is product) at room temperature. (d) VT-PXRD of CEL-VLM-III up to 85 °C showed conversion to CEL-VLM-II at 70 °C.

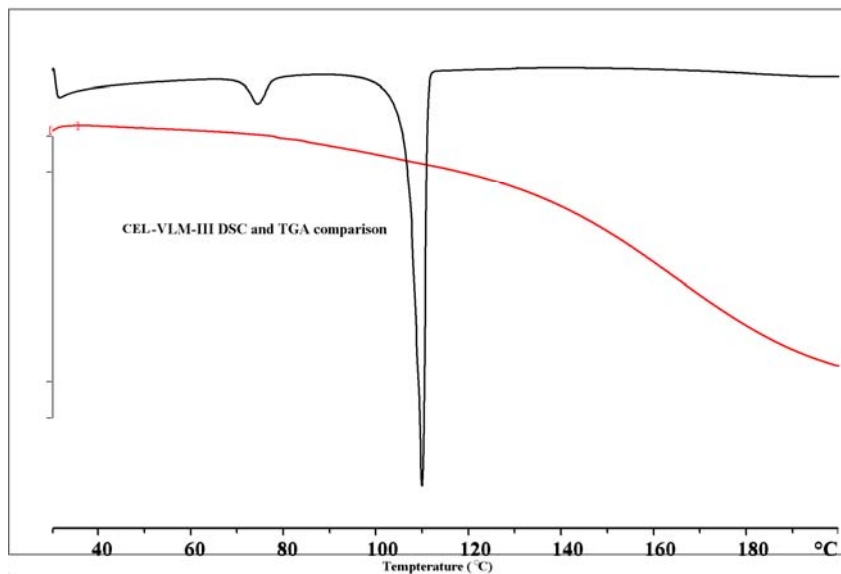

(a)

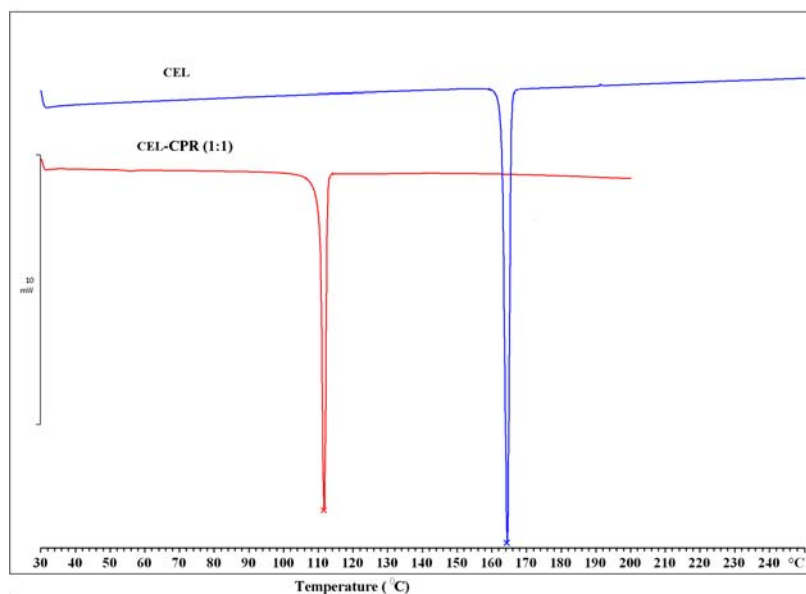

(b)

**Fig. S8** (a) DSC and TGA of CEL-VLM-III. There is no weight loss at 70-80 °C which indicates a phase transformation. (b) DSC of CEL and CEL-CPR (1:1) to show the melting point of the cocrystal.



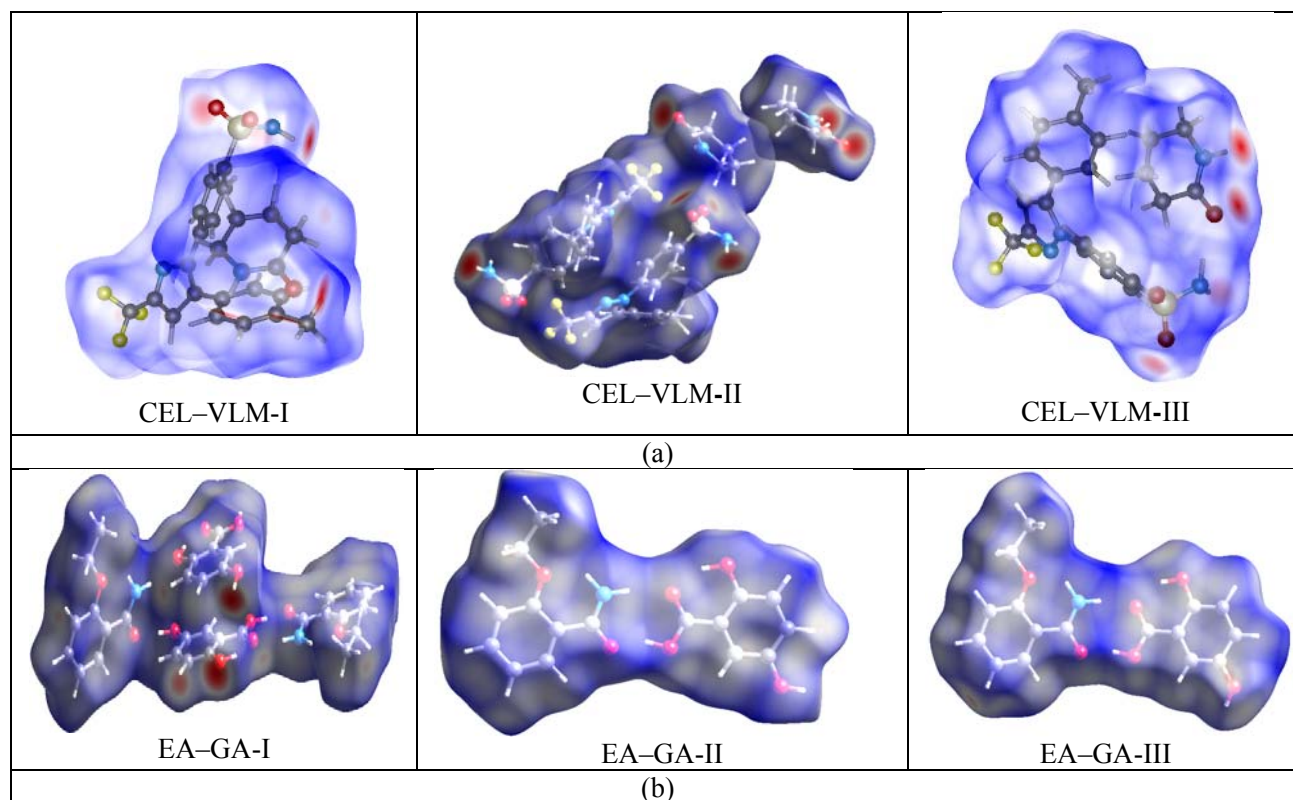

**Fig. S9** Hirshfeld surface electron density maps of polymorphic cocrystals. (a) CEL-VLM-I, CEL-VLM-II, and CEL-VLM-III; (b) EA-GA-I, EA-GA-II and EA-GA-III.

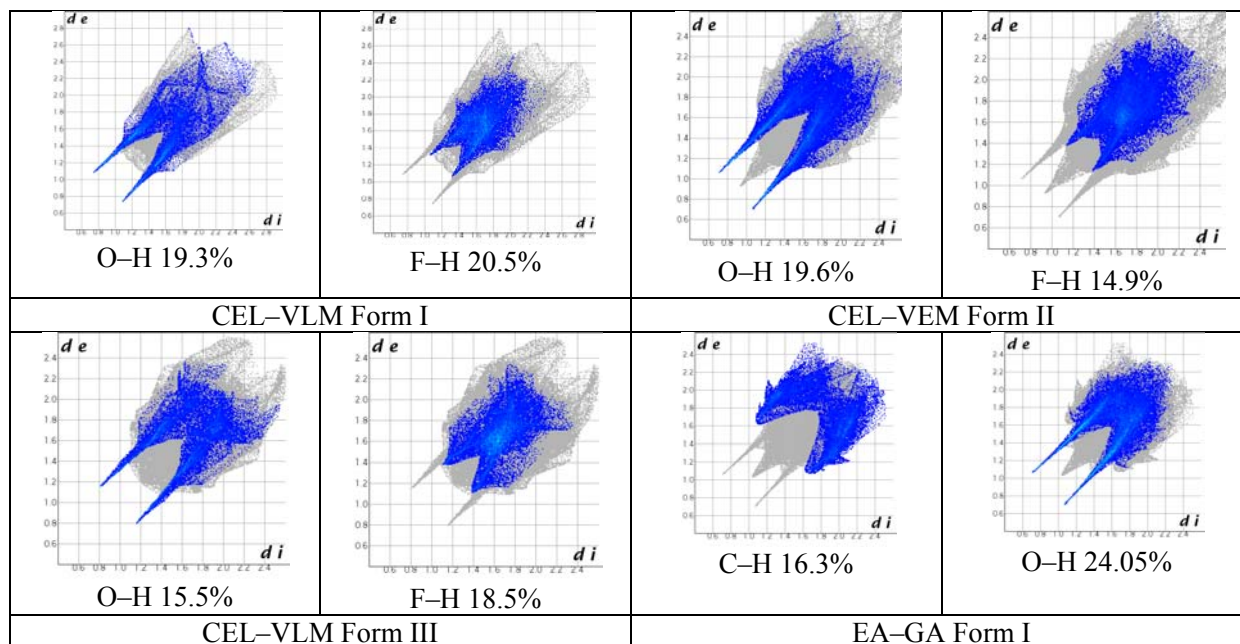

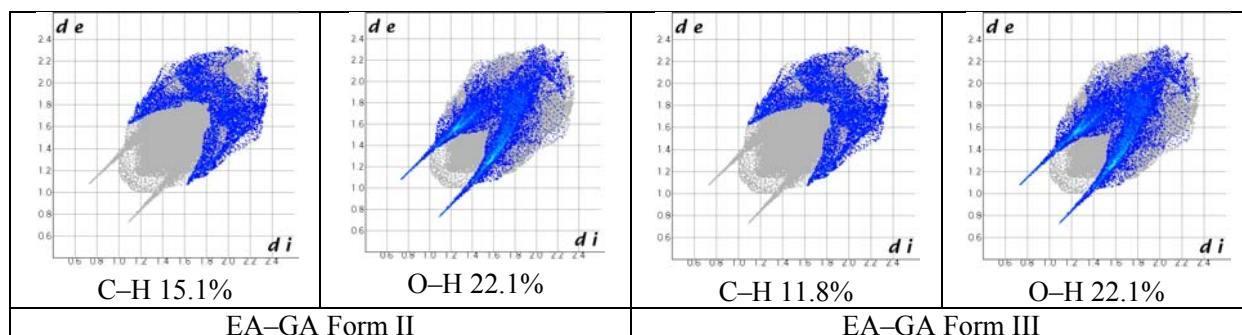

**Fig. S10** Hirshfeld finger print plots of the top two (major) interactions in trimorphs. (a)  $O\cdots H + F\cdots H$  in CEL-VLM and  $O\cdots H + C\cdots H$  in EA-GA structures (see Table 1 for values).

### Experimental Section

Celecoxib was purchased from Yarrow Chemicals, Mumbai, India and the cofomers and solvents were purchased from Merck/Aldrich-Sigma local suppliers. All chemicals are of analytical or chromatography grade. Water filtered through a double deionized purification system (AquaDM, Bhanu, Hyderabad, India) was used in all experiments. Experimental details of cocrystal preparation are summarized below.

**Table S8** Summary of experimental conditions for CEL cocrystals.

| Crystal form      | CEL (mg, mmol) | Cofomer (mg, mmol) | Solvent added for grinding | Solvent for crystallization (v/v ratio)         |
|-------------------|----------------|--------------------|----------------------------|-------------------------------------------------|
| CEL               | 100.0,         | ---                | ---                        | ---                                             |
| CEL-2PY (1:1)     | 100.0, 0.262   | 22.2, 0.262        | EtOAc, THF                 | EtOAc, THF (1:1)                                |
| CEL-VLM-I (1:1)   | 100.0, 0.262   | 25.99, 0.262       | EtOAc, THF                 | THF, Anisole                                    |
| CEL-VLM-II (1:1)  | 100.0, 0.262   | 25.99, 0.262       | EtOAc, THF                 | EtOAc-Cyclohexane (1:1), THF-Cyclohexane (1:1). |
| CEL-VLM-III (1:1) | 100.0, 0.262   | 25.99, 0.262       | EtOAc, THF                 | THF-Cyclohexane (1:1)                           |
| CEL-CPR (1:1)     | 100.0, 0.262   | 29.6, 0.262        | EtOAc, THF                 | Anisole-THF (1:1)                               |
| CEL-AZL (1:1)     | 100.0, 0.262   | 33.29, 0.262       | EtOAc, THF                 | EtOAc, Anisole-THF (1:1)                        |

#### CEL-PYR (1:1) cocrystal

100 mg (0.262 mmol) of the celecoxib and 22.2 mg (0.262 mmol) PYR were ground in a mortar-pestle for 20 min by liquid assisted grinding Ethylacetate, THF as a solvent, and then kept for crystallization in 10 mL Ethyl acetate-THF solvent mixture (1:1) in v/v ratio at room temperature in 25 mL conical flask covered with Aluminum paper. Block morphology crystals appeared after solvent evaporation at ambient conditions after 3-4 days. m.p. 130-131 °C.

#### CEL-VLM-I (1:1) cocrystal

100 mg (0.262 mmol) celecoxib and 25.99 mg (0.262 mmol) VLM were ground in a mortar-pestle for 10 min by liquid assisted grinding Ethylacetate, THF as a solvent, and then kept for crystallization in 10 mL Ethyl acetate-THF, EtOAc-Cyclohexane solvent mixture (1:1) in v/v ratio and in Anisole (10 mL) at room temperature in 25 mL conical flask covered with Aluminum paper. Block morphology crystals appeared after solvent evaporation at ambient conditions after 3-4 days. m.p. 106-108 °C.



#### **CEL–VLM-II (1:1) cocrystal**

100 mg (0.262 mmol) celecoxib and 25.99 mg (0.262 mmol) VLM were ground in a mortar-pestle for 20 min by liquid assisted grinding Ethyl acetate, THF as a solvent, and then kept for crystallization in 10 mL Ethyl acetate–THF, EtOAc–Cyclohexane solvent mixture (1:1) in v/v ratio at room temperature in 25 mL conical flask covered with Aluminum paper. Block morphology crystals appeared after solvent evaporation at ambient conditions after 3-4 days. m.p. 108-111 °C.

#### **CEL–VLM-III (1:1) cocrystal**

100 mg (0.262 mmol) celecoxib and 25.99 mg (0.262 mmol) VLM were kept direct crystallization in different solvents like EtOAc, THF, EtOAc:Cyclohexane, THF:Cyclohexane in 1:1 v/v ratio at room temperature in 25 mL conical flask covered with aluminum foil. After 3-4 days good quality crystals were appeared. m.p 71-72 °C.

#### **CEL–CPR (1:1) cocrystal**

100 mg (0.262 mmol) celecoxib and 29.6 mg (0.262 mmol) CPR were ground in a mortar-pestle for 20 min by liquid assisted grinding Ethylacetate/THF as a solvent, and then kept for crystallization in 10 mL Ethyl acetate–THF, EtOAc–Cyclohexane, Anisole–THF solvent mixture (1:1) in v/v ratio at room temperature in 25 mL conical flask covered with Aluminum paper. Block morphology crystals appeared after solvent evaporation at ambient conditions after 3-4 days. m.p. 110-111 °C.

#### **CEL–AZL (1:1) cocrystal**

100 mg (0.262 mmol) celecoxib and 33.29 mg (0.262 mmol) AZL were ground in a mortar-pestle for 20 min by liquid assisted grinding Ethyl acetate/THF as a solvent, and then kept for crystallization in 10 mL Ethyl acetate as a solvent at room temperature in 25 mL conical flask covered with Aluminum paper. Block morphology crystals resulted after solvent evaporation at ambient conditions after 3-4 days. m.p. 108-109 °C.

#### **Single crystal X-ray diffraction**

A single crystal obtained from the crystallization solvent(s) was mounted on the goniometer of Oxford Gemini (Oxford Diffraction, Yarnton, Oxford, UK) or Bruker Smart (Bruker-AXS, Karlsruhe, Germany) X-ray diffractometer equipped with Mo-K $\alpha$  radiation source ( $\lambda = 0.71073 \text{ \AA}$ ). Data reduction was performed using CrysAlisPro 171.33.55 software. Crystal structures were solved and refined using Olex2-1.0 with anisotropic displacement parameters for non-H atoms. Hydrogen atoms were experimentally located through the Fourier difference electron density maps in all crystal structures. All O–H, N–H and C–H atoms were geometrically fixed using HFIX command in SHELX-TL program of Bruker-AXS. A check of the final crystallographic information file (CIF) with PLATON did not show any missed symmetry. X-Seed was used to prepare the figures and packing diagrams. Crystallographic .cif files are deposited with the CCDC Nos. 954140 – 954145.

#### **Powder X-ray diffraction**

All the new solid phases, CEL and cofomers were analyzed by Powder X-ray diffraction on a Bruker AXS D8 diffractometer (Bruker-AXS, Karlsruhe, Germany). Experimental conditions: Cu-K $\alpha$  radiation ( $\lambda = 1.54056 \text{ \AA}$ ); 40 kV; 30 mA; scanning interval 5-50° 2 $\theta$  at a scan rate of 1° min<sup>-1</sup>; time per step 0.5 s.

The experimental PXRD patterns and calculated X-ray lines from the single crystal structure were compared to confirm the purity of the bulk phase of cocrystals using Powder Cell.

#### **Thermal analysis**

DSC experiments were performed on a Mettler-Toledo DSC 822e module. Samples were placed in vented aluminum sample pans for DSC. A typical sample size is 2-5 mg for DSC. The temperature range was 30-250 °C at 5K min<sup>-1</sup> for DSC. Samples were purged with a stream of dry N<sub>2</sub> gas flowing at 80 mL min<sup>-1</sup>.

#### **Vibrational spectroscopy**

Thermo-Nicolet 6700 FT-IR spectrometer (Waltham, MA, USA) was used to record IR spectra. IR spectra were recorded on samples dispersed in dry KBr pellets.

#### **Solid-state NMR spectroscopy**

The solid-state <sup>13</sup>C NMR spectra were obtained on a Bruker Ultrashield 400 spectrometer (Bruker BioSpin, Karlsruhe, Germany) utilizing a <sup>13</sup>C resonant frequency of 100 MHz (magnetic field strength of 9.39 T). Approximately 100 mg of crystalline sample was lightly packed into a zirconium rotor with a Kel-F cap. The crosspolarization, magic angle spinning (CP-MAS) pulse sequence was used for spectral acquisition. Each sample was spun at a frequency of 5.0 ± 0.01 kHz and the magic angle setting was calibrated by the KBr method. Each data set was subjected to a 5.0 Hz line broadening factor and subsequently Fourier transformed and phase corrected to produce a frequency domain spectrum. The chemical shifts were referenced to TMS using glycine (δ glycine = 43.3 ppm) as an external secondary standard.

#### **References**

1. E. Elacqua, D. Bucar, R. F. Henry, G. G. Z. Zhang and L. R. MacGillivray, *Cryst. Growth Des.*, 2013, **13**, 393.
2. N. R. Goud, N. J. Babu and A. Nangia, *Cryst. Growth Des.*, 2011, **11**, 1930.
